# Supplementary material for: Spatiotemporal Variation in Ground Level Ozone and Its Driving Factors: A Comparative Study of Coastal and Inland Cities in Eastern China
Source: MDPI journal article supplement (doi:10.3390/ijerph19159687), 2022-08-05
Supplement: s1 [file s1]

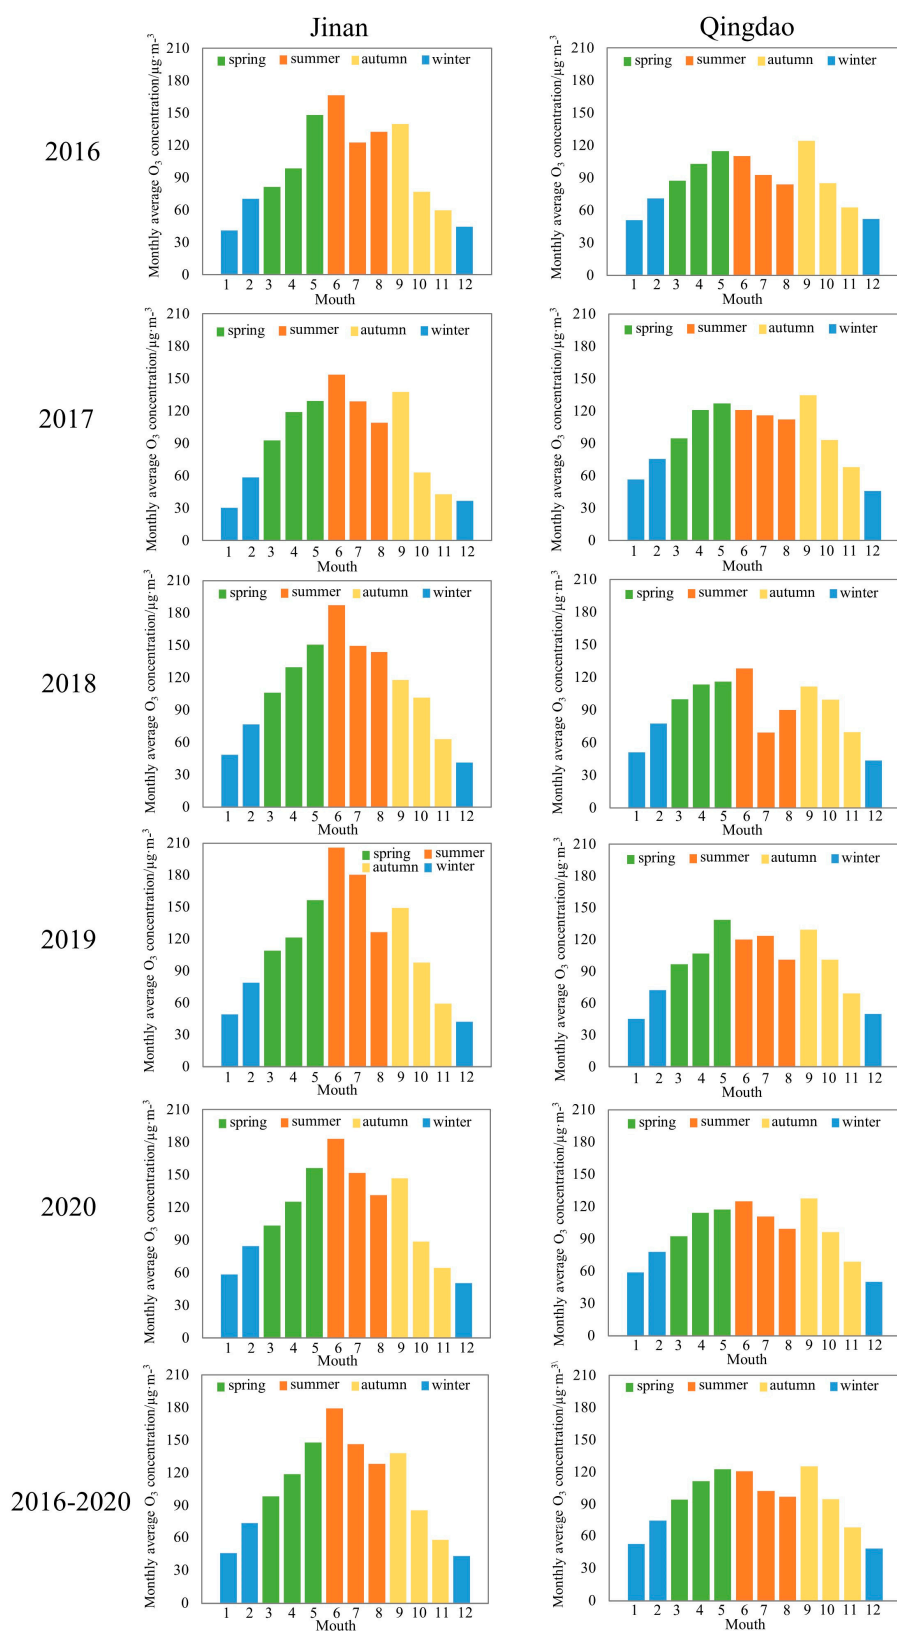

Supplementary Figure S1 Histogram of monthly average O<sub>3</sub> concentration changes from 2016 to 2020.

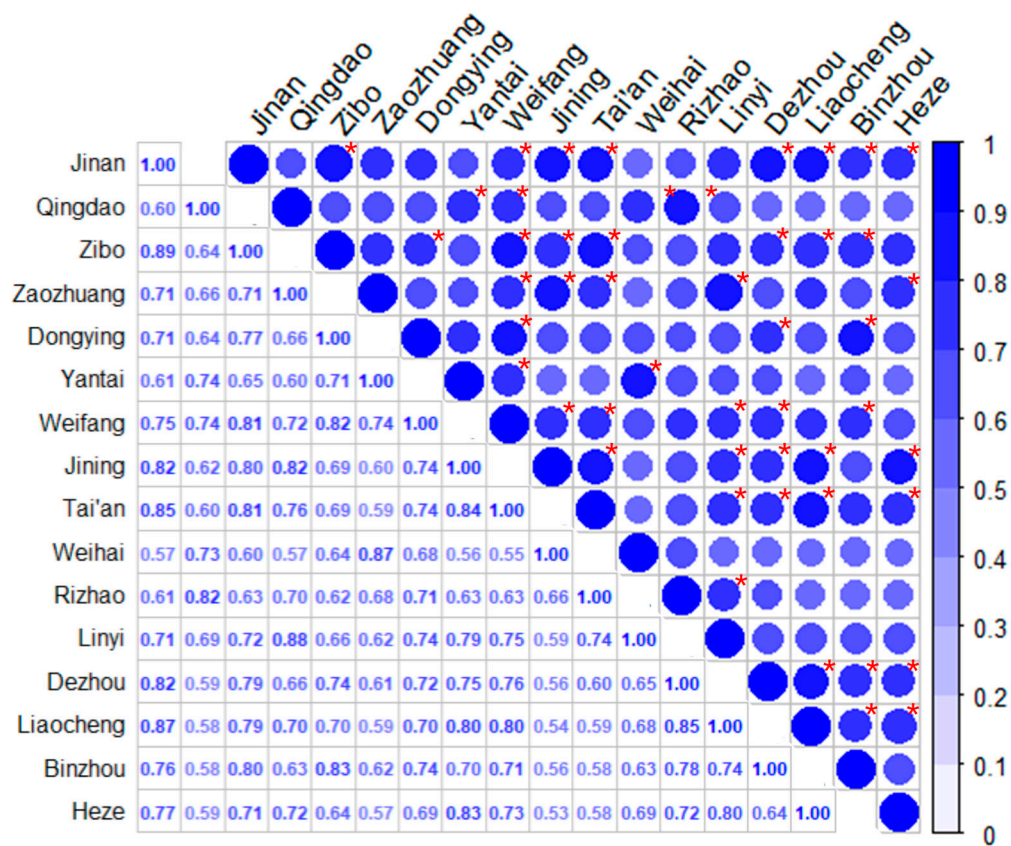

Supplementary Figure S2 ARsq among cities in Shandong province from 2016 to 2020. \* is indicates passing the 95% significance level test.

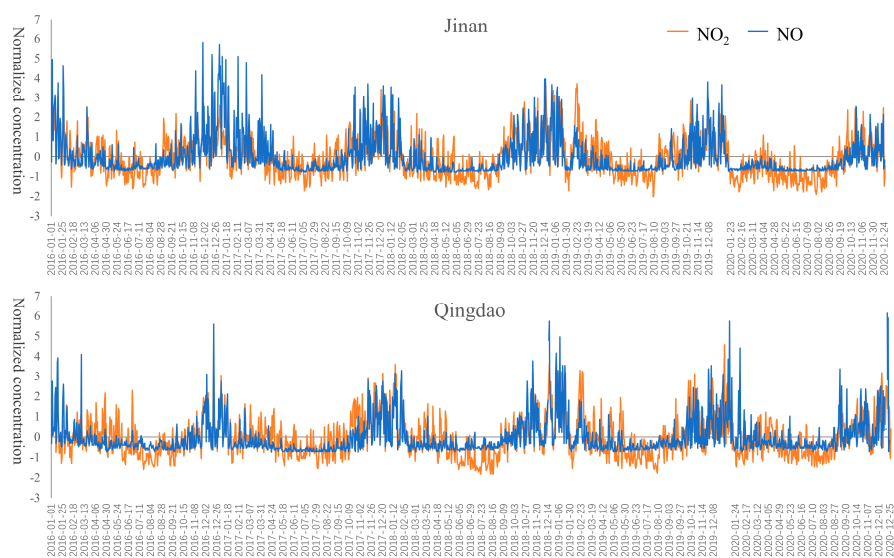

Supplementary Figure S3 Line chart of the daily change of the daily maximum 8-hour average (DMA8) O<sub>3</sub> concentration in Jinan and Qingdao.
